# Supplementary material
Source: Research Square preprint supplement (doi:10.21203/rs.3.rs-10194598/v1)
Supplement: Supplementary file 1 [file 3ef6b1919aa779dfb192d6a0.docx]

**Supplementary Materials**

*Enabling Conditions and Sequencing for Sustainable Prosthetic and Orthotic Care: Development of the ROOTS Framework through Realist Evaluation in Post-Conflict Sierra Leone*

Riccio-Ackerman et al. | BMJ Global Health | Submitted June 2026

**Table S1. External organizations active in Sierra Leone P&O sector, 1993–2023.**

*All organizations anonymized. Codes assigned for internal reference only. Organization A is referenced in the Results and Discussion sections. Note: none of the organizations listed below established a formal supply chain or produced a clinician in accredited P&O education. This table documents the structural pattern described in §3.1 and §4.1, not individual organizational failures.*

| **Organization** | **Years active** | **Funded patient devices?** | **Donated P&O supplies?** | **Established fabrication capacity?** | **Provided training (ISPO-accredited)?** | **Active at program inception (2023)?** |
| --- | --- | --- | --- | --- | --- | --- |
| Organization A | Active during program period; no longer visiting | No | No | No | Yes (No) | No |
| Organization B | 1993–2015 | Yes | No | Yes | Yes (Yes) | No |
| Organization C | 1999–2009 | Yes | Yes | Yes | Yes (Yes) | No |
| Organization D | 2000–2015 | Yes | Yes | Yes | No | No |
| Organization E | 2003, 2013–2017 | Yes | No | Yes | No | No |
| Organization F | 2013–2020 | No | Yes | No | No | No |
| Organization G | 2017–2018 | No | No | No | No | No |
| Organization H | 2017–2018 | Yes | No | No | No | No |
| Organization I | 2017–2021 | No | No | No | No | No |
| Organization J | 2018–2022 | No | No | No | No | Yes |
| Organization K | 2021–current | No | Yes | No | No | Yes |

*ISPO = International Society for Prosthetics and Orthotics.*

**Table S2. Participant codes and characteristics.**

*IH = Interest Holder; PU = Prosthesis User. All interviews conducted in English. Role/position descriptions are generalized to protect participant confidentiality; specific job titles and clinic assignments are retained where they are necessary to interpret the participant's perspective and where identification risk is low. Sex and gender were not collected as individual-level variables, as they are not relevant to the implementation outcomes analyzed in this study.*

| **Participant code** | **Category** | **Role / position** | **Location** | **Interview mode** | **Language** |
| --- | --- | --- | --- | --- | --- |
| IH1 | Interest Holder | APO student, NRC | Freetown | In person | English |
| IH2 | Interest Holder | APO student, NRC | Freetown | In person | English |
| IH3 | Interest Holder | APO student / education program, NRC | Freetown | In person | English |
| IH4 | Interest Holder | Senior clinician / program staff, NRC | Freetown | In person | English |
| IH5 | Interest Holder | Program staff, NRC | Freetown | In person | English |
| IH6 | Interest Holder | Senior clinician / country program lead | Freetown | In person | English |
| IH7 | Interest Holder | Clinician / program staff, Bo Clinic | Freetown | In person | English |
| IH8 | Interest Holder | Clinician / program staff, Bo Clinic | Freetown | In person | English |
| IH9 | Interest Holder | Government / ministry partner | Freetown | Remote | English |
| IH10 | Interest Holder | Education partner / clinical educator | Freetown | Remote | English |
| PU1 | Prosthesis User | Recipient of prosthetic care, NRC | Freetown | In person | English |
| PU2 | Prosthesis User | Recipient of prosthetic care, NRC | Freetown | In person | English |
| PU3 | Prosthesis User | Recipient of prosthetic care, NRC | Freetown | In person | English |
| PU4 | Prosthesis User | Recipient of prosthetic care, NRC | Freetown | In person | English |

*NRC = National Rehabilitation Centre, Freetown.*
